# Supplementary material for: Distribution and Potential Sources of OCPs and PAHs in Waters from the Danshui River Basin in Yichang, China
Source: MDPI journal article supplement (doi:10.3390/ijerph19010263), 2021-12-27
Supplement: s1 [file s1]

**Table S1.** Method detection limits (MDLs), linearity range and linearity correlation coefficients ( $R^2$ ) of OCPs and PAHs.

| Compounds          | MDLs<br>(pg·L <sup>-1</sup> ) | Linearity range<br>(µg/L) | $R^2$  | Compounds | MDLs<br>(ng·L <sup>-1</sup> ) | Linearity range<br>(mg/L) | $R^2$  |
|--------------------|-------------------------------|---------------------------|--------|-----------|-------------------------------|---------------------------|--------|
| $\alpha$ -HCH      | 15                            | 10–200                    | 0.9999 | Nap       | 1.8                           | 0.05–10                   | 0.9985 |
| $\beta$ -HCH       | 15                            | 10–200                    | 0.9998 | Acy       | 0.04                          | 0.05–10                   | 0.9989 |
| $\gamma$ -HCH      | 10                            | 10–200                    | 0.9999 | Ace       | 0.05                          | 0.05–10                   | 0.9985 |
| $\delta$ -HCH      | 10                            | 10–200                    | 0.9998 | Flu       | 0.04                          | 0.05–10                   | 0.9993 |
| <i>o,p'</i> -DDE   | 10                            | 10–200                    | 0.9999 | Phe       | 0.13                          | 0.05–10                   | 0.9993 |
| <i>p,p'</i> -DDE   | 10                            | 10–200                    | 0.9999 | Ant       | 0.02                          | 0.05–10                   | 0.9995 |
| <i>o,p'</i> -DDD   | 10                            | 10–200                    | 0.9999 | Fla       | 0.02                          | 0.05–10                   | 0.9995 |
| <i>p,p'</i> -DDD   | 10                            | 10–200                    | 0.9999 | Pyr       | 0.05                          | 0.05–10                   | 0.9996 |
| <i>o,p'</i> -DDT   | 20                            | 10–200                    | 0.9999 | BaA       | 0.1                           | 0.05–10                   | 0.9993 |
| <i>p,p'</i> -DDT   | 20                            | 10–200                    | 0.9999 | Chr       | 0.02                          | 0.05–10                   | 0.9991 |
| HCB                | 12                            | 10–200                    | 0.9996 | BbF       | 0.1                           | 0.05–10                   | 0.9992 |
| methoxychlor       | 20                            | 10–200                    | 0.9974 | BkF       | 0.05                          | 0.05–10                   | 0.9990 |
| TC                 | 10                            | 10–200                    | 0.9999 | BaP       | 0.2                           | 0.05–10                   | 0.9994 |
| CC                 | 10                            | 10–200                    | 0.9999 | Icdp      | 0.02                          | 0.05–10                   | 0.9973 |
| heptachlor         | 13                            | 10–200                    | 0.9999 | DahA      | 0.02                          | 0.05–10                   | 0.9988 |
| heptachlor-epoxide | 20                            | 10–200                    | 0.9999 | BghiP     | 0.02                          | 0.05–10                   | 0.9992 |
| $\alpha$ -Endo     | 10                            | 10–200                    | 0.9999 | /         | /                             | /                         | /      |
| $\beta$ -Endo      | 10                            | 10–200                    | 0.9998 | /         | /                             | /                         | /      |
| ES                 | 10                            | 10–200                    | 0.9998 | /         | /                             | /                         | /      |
| aldrin             | 15                            | 10–200                    | 0.9999 | /         | /                             | /                         | /      |
| dieldrin           | 15                            | 10–200                    | 0.9993 | /         | /                             | /                         | /      |
| endrin             | 15                            | 10–200                    | 0.9992 | /         | /                             | /                         | /      |
| endrin aldehyde    | 20                            | 10–200                    | 0.9998 | /         | /                             | /                         | /      |
| endrin ketone      | 20                            | 10–200                    | 0.9999 | /         | /                             | /                         | /      |

**Table S2.** Flow velocity (L·s<sup>-1</sup>) in the Danshui River Basin.

| Sample | Flow velocity |
|--------|---------------|
| 1      | 2             |
| 2      | 11            |
| 3      | 430           |
| 5      | 110           |
| 6      | 489           |
| 7      | 2             |
| 8      | 56            |
| 9      | 193.4         |
| 10     | 14.8          |
| 13     | 88            |
| 15     | 52            |
| 16     | 5.9           |
| 17     | 43            |
| 18     | 638           |
| 19     | 139           |
| 20     | 1488          |

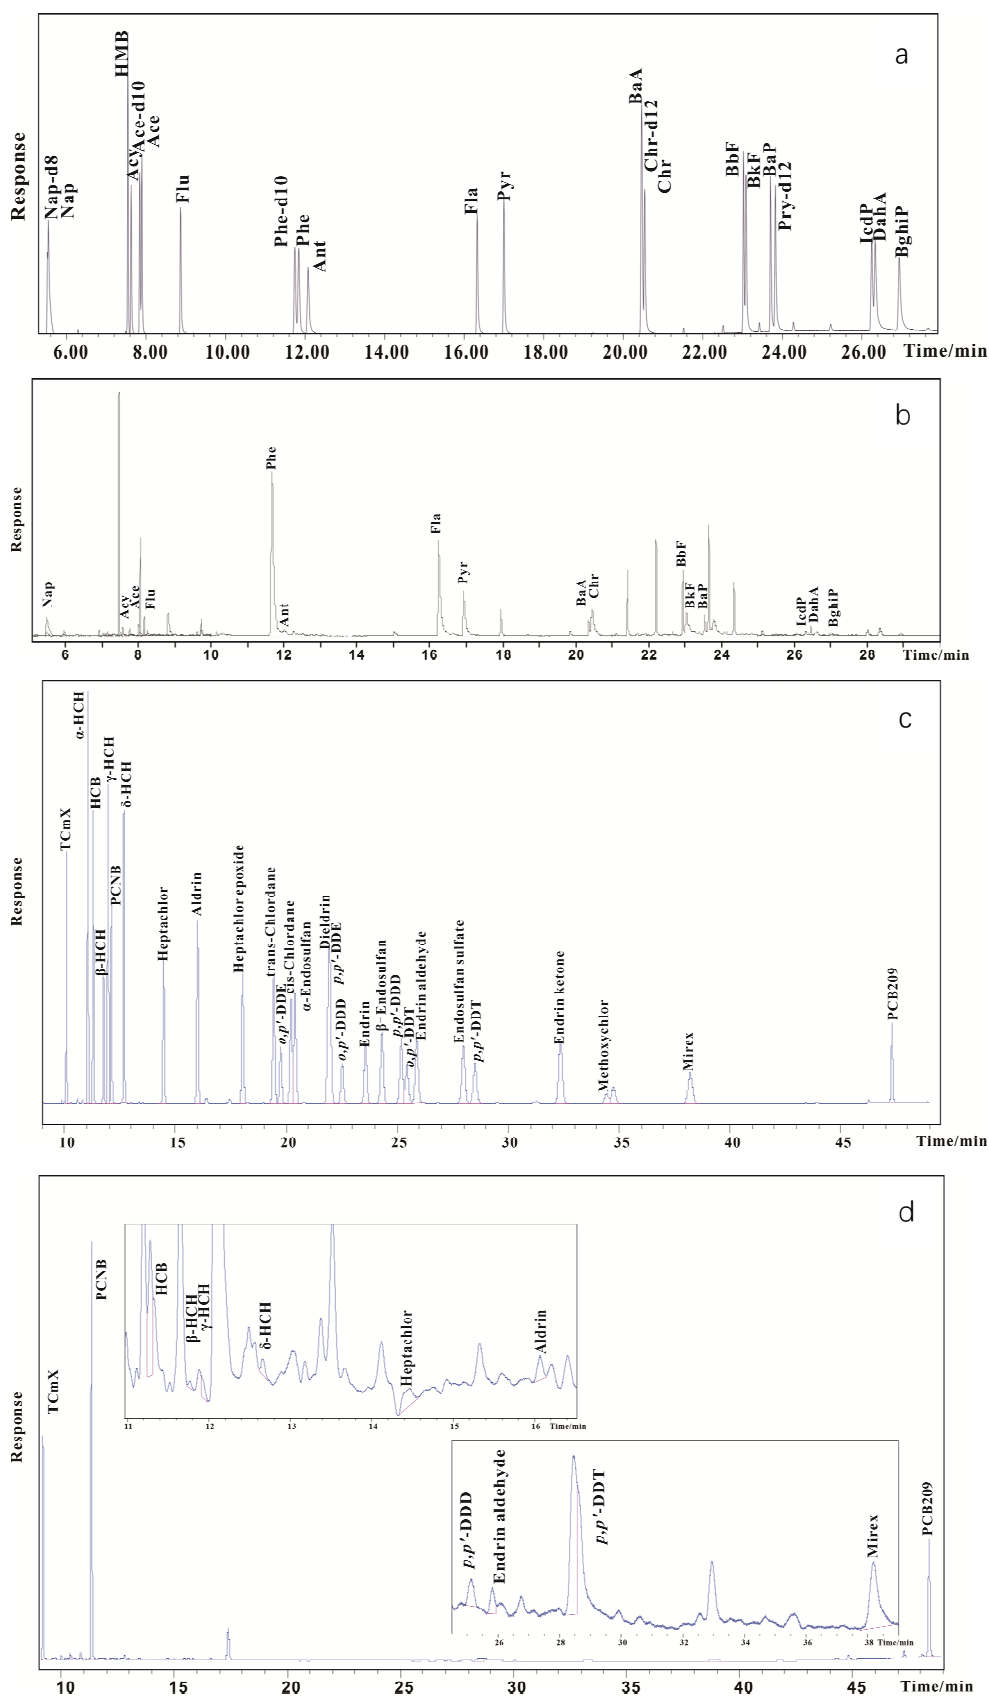

**Figure S1.** Chromatograms of standard (a) and typical sample (b) for OCPs analysis by GC-ECD and chromatograms of standard (c) and typical sample (d) for PAHs analysis by GC-MS

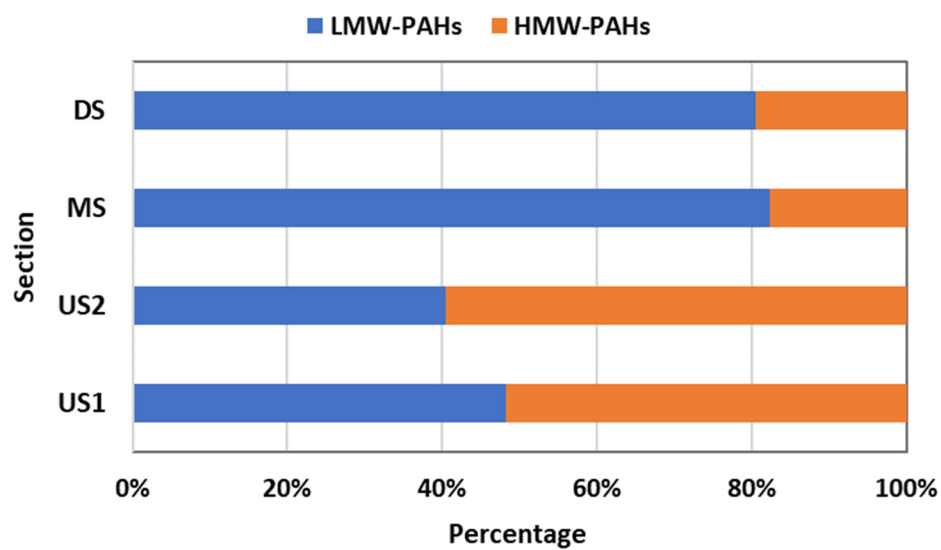

**Figure S2.** Proportion of LMS-PAHs and HMW-PAHs in the different sections (US1: Upstream 1, US2: Upstream 2, MS: Middle Stream, DS: Downstream); data from Site 8 were not included due to the extremely high concentration.
